# Supplementary material for: Integrated animal movement and spatial capture–recapture models: Simulation, implementation, and inference
Source: PubMed Central journal article supplement — Ecology. 2022 Jul 15;103(10):e3771. doi: 10.1002/ecy.3771 (PMC9787507; doi:10.1002/ecy.3771), 2022-07-15
Supplement: ECY-103-e3771-s002.pdf [file ECY-103-e3771-s002.pdf]

**Supporting Information.** Gardner, B., B. T. McClintock, S. J. Converse, and N. J. Hostetter. 2022. Integrated animal movement and spatial capture-recapture models: Simulation, implementation, and inference. *Ecology*.

## Appendix S1

This appendix includes the summaries of all the parameters in each of the 18 Scenarios presented in the main text, including Scenarios 1–6 with  $T = 15$  and Scenarios 7A–12A which include telemetered individuals. These results are presented in Tables [S1](#) - [S5](#).

Table [S6](#) includes the average number of captures and recaptures for each scenario along with the number of simulations that did not converge according the R-hat values. We note that many of these simulations would have resulted in convergence if we had set the number of iterations higher in the MCMC settings, but this would have made the simulation study prohibitively long. For Scenarios 7-12, we ran 100,000 iterations, and in most cases  $\gamma$  was the parameter that did not converge due to mostly to slow mixing. In comparing the number of captured and recaptured individuals, as well as the parameter estimates and standard deviations between simulated datasets where the models converged and those that didn't, we found little to no difference.

| <b>Parameter</b>  | <b>True</b> | <b>Mean</b> | <b>sd</b> | <b>median</b> | <b>2.5%</b> | <b>97.5%</b> | <b>Coverage</b> |
|-------------------|-------------|-------------|-----------|---------------|-------------|--------------|-----------------|
| <b>Scenario 1</b> |             |             |           |               |             |              |                 |
| N                 | 100.00      | 102.243     | 20.443    | 100.590       | 69.930      | 146.850      | 98              |
| $\sigma$          | 0.10        | 0.100       | 0.009     | 0.100         | 0.084       | 0.121        | 93              |
| $\sigma_{det}$    | 0.05        | 0.051       | 0.005     | 0.051         | 0.042       | 0.060        | 96              |
| $\lambda_0$       | 3.00        | 3.090       | 0.565     | 3.036         | 2.145       | 4.352        | 95              |
| <b>Scenario 2</b> |             |             |           |               |             |              |                 |
| N                 | 100.00      | 100.437     | 17.617    | 99.210        | 69.490      | 138.260      | 96              |
| $\sigma$          | 0.10        | 0.100       | 0.007     | 0.100         | 0.087       | 0.114        | 94              |
| $\sigma_{det}$    | 0.10        | 0.100       | 0.004     | 0.100         | 0.092       | 0.109        | 97              |
| $\lambda_0$       | 2.00        | 2.042       | 0.231     | 2.028         | 1.630       | 2.535        | 94              |
| <b>Scenario 3</b> |             |             |           |               |             |              |                 |
| N                 | 100.00      | 100.855     | 17.4124   | 99.660        | 70.220      | 138.19       | 94              |
| $\sigma$          | 0.10        | 0.103       | 0.010     | 0.102         | 0.084       | 0.123        | 95              |
| $\sigma_{det}$    | 0.15        | 0.149       | 0.010     | 0.149         | 0.131       | 0.169        | 99              |
| $\lambda_0$       | 0.50        | 0.520       | 0.081     | 0.514         | 0.380       | 0.698        | 97              |
| <b>Scenario 4</b> |             |             |           |               |             |              |                 |
| N                 | 100.00      | 100.083     | 18.430    | 98.640        | 68.110      | 140.090      | 97              |
| $\sigma$          | 0.20        | 0.203       | 0.018     | 0.202         | 0.171       | 0.241        | 91              |
| $\sigma_{det}$    | 0.05        | 0.050       | 0.004     | 0.050         | 0.042       | 0.059        | 95              |
| $\lambda_0$       | 3.00        | 3.157       | 0.577     | 3.103         | 2.188       | 4.441        | 91              |
| <b>Scenario 5</b> |             |             |           |               |             |              |                 |
| N                 | 100.00      | 101.407     | 15.556    | 100.470       | 73.770      | 134.570      | 95              |
| $\sigma$          | 0.20        | 0.201       | 0.010     | 0.201         | 0.182       | 0.222        | 92              |
| $\sigma_{det}$    | 0.10        | 0.099       | 0.004     | 0.099         | 0.091       | 0.108        | 95              |
| $\lambda_0$       | 2.00        | 2.052       | 0.227     | 2.039         | 1.642       | 2.532        | 97              |
| <b>Scenario 6</b> |             |             |           |               |             |              |                 |
| N                 | 100.00      | 98.619      | 15.614    | 97.570        | 71.020      | 131.940      | 96              |
| $\sigma$          | 0.20        | 0.200       | 0.014     | 0.200         | 0.173       | 0.230        | 94              |
| $\sigma_{det}$    | 0.15        | 0.152       | 0.012     | 0.151         | 0.130       | 0.177        | 95              |
| $\lambda_0$       | 0.50        | 0.507       | 0.090     | 0.500         | 0.350       | 0.704        | 99              |

Table S1: Summaries of the parameter estimates for each of the simulation scenarios of the simple random walk model (labeled as Scenarios 1 – 6 in the main text). Each scenario has  $T = 25$  sampling occasions.

| <b>Parameter</b>         | <b>True</b> | <b>Mean</b> | <b>sd</b> | <b>median</b> | <b>2.5%</b> | <b>97.5%</b> | <b>Coverage</b> |
|--------------------------|-------------|-------------|-----------|---------------|-------------|--------------|-----------------|
| <b>Scenario 1 T = 15</b> |             |             |           |               |             |              |                 |
| N                        | 100.00      | 104.916     | 26.021    | 101.860       | 62.720      | 164.280      | 97              |
| $\sigma$                 | 0.10        | 0.102       | 0.014     | 0.101         | 0.078       | 0.133        | 96              |
| $\sigma_{det}$           | 0.05        | 0.050       | 0.007     | 0.050         | 0.038       | 0.064        | 98              |
| $\lambda_0$              | 3.00        | 3.246       | 0.799     | 3.141         | 1.992       | 5.106        | 90              |
| <b>Scenario 2 T = 15</b> |             |             |           |               |             |              |                 |
| N                        | 100.00      | 100.719     | 18.528    | 99.390        | 68.320      | 140.680      | 96              |
| $\sigma$                 | 0.10        | 0.100       | 0.010     | 0.099         | 0.082       | 0.120        | 95              |
| $\sigma_{det}$           | 0.10        | 0.101       | 0.006     | 0.100         | 0.090       | 0.112        | 100             |
| $\lambda_0$              | 2.00        | 2.038       | 0.302     | 2.014         | 1.517       | 2.696        | 94              |
| <b>Scenario 3 T = 15</b> |             |             |           |               |             |              |                 |
| N                        | 100.00      | 102.192     | 18.544    | 100.880       | 69.720      | 142.090      | 93              |
| $\sigma$                 | 0.10        | 0.102       | 0.015     | 0.102         | 0.075       | 0.133        | 93              |
| $\sigma_{det}$           | 0.15        | 0.148       | 0.013     | 0.148         | 0.125       | 0.175        | 96              |
| $\lambda_0$              | 0.50        | 0.538       | 0.110     | 0.527         | 0.354       | 0.783        | 95              |
| <b>Scenario 4 T = 15</b> |             |             |           |               |             |              |                 |
| N                        | 100.00      | 101.301     | 22.751    | 98.980        | 63.580      | 152.480      | 95              |
| $\sigma$                 | 0.20        | 0.204       | 0.026     | 0.202         | 0.160       | 0.262        | 96              |
| $\sigma_{det}$           | 0.05        | 0.052       | 0.006     | 0.051         | 0.040       | 0.064        | 99              |
| $\lambda_0$              | 3.00        | 3.187       | 0.771     | 3.091         | 1.9624      | 4.969        | 93              |
| <b>Scenario 5 T = 15</b> |             |             |           |               |             |              |                 |
| N                        | 100.00      | 101.814     | 17.016    | 100.650       | 71.750      | 138.300      | 95              |
| $\sigma$                 | 0.20        | 0.200       | 0.014     | 0.199         | 0.174       | 0.228        | 93              |
| $\sigma_{det}$           | 0.10        | 0.100       | 0.006     | 0.100         | 0.090       | 0.111        | 92              |
| $\lambda_0$              | 2.00        | 2.037       | 0.292     | 2.016         | 1.524       | 2.665        | 92              |
| <b>Scenario 6 T = 15</b> |             |             |           |               |             |              |                 |
| N                        | 100.00      | 97.450      | 17.102    | 96.270        | 67.530      | 134.300      | 93              |
| $\sigma$                 | 0.20        | 0.199       | 0.021     | 0.198         | 0.160       | 0.243        | 95              |
| $\sigma_{det}$           | 0.15        | 0.154       | 0.016     | 0.153         | 0.126       | 0.189        | 96              |
| $\lambda_0$              | 0.50        | 0.508       | 0.118     | 0.496         | 0.312       | 0.771        | 93              |

Table S2: Summaries of the parameter estimates for each of the simulation scenarios of the simple random walk model (labeled as Scenarios 1 – 6 in the main text). Each scenario has  $T = 15$  sampling occasions in this set of simulations.

| <b>Parameter</b>   | <b>True</b> | <b>Mean</b> | <b>sd</b> | <b>median</b> | <b>2.5%</b> | <b>97.5%</b> | <b>Coverage</b> |
|--------------------|-------------|-------------|-----------|---------------|-------------|--------------|-----------------|
| <b>Scenario 7</b>  |             |             |           |               |             |              |                 |
| N                  | 100.00      | 101.376     | 18.114    | 100.060       | 69.820      | 140.480      | 95              |
| $\sigma$           | 0.10        | 0.110       | 0.016     | 0.109         | 0.082       | 0.142        | 92              |
| $\sigma_{det}$     | 0.05        | 0.050       | 0.003     | 0.050         | 0.043       | 0.057        | 99              |
| $\lambda_0$        | 5.00        | 5.120       | 0.738     | 5.056         | 3.862       | 6.752        | 98              |
| $\gamma$           | 0.50        | 0.411       | 0.118     | 0.416         | 0.168       | 0.624        | 97              |
| <b>Scenario 8</b>  |             |             |           |               |             |              |                 |
| N                  | 100.00      | 99.419      | 15.740    | 98.400        | 71.550      | 133.070      | 96              |
| $\sigma$           | 0.10        | 0.101       | 0.010     | 0.100         | 0.083       | 0.121        | 95              |
| $\sigma_{det}$     | 0.10        | 0.100       | 0.003     | 0.100         | 0.094       | 0.107        | 99              |
| $\lambda_0$        | 3.00        | 3.032       | 0.272     | 3.018         | 2.538       | 3.604        | 95              |
| $\gamma$           | 0.50        | 0.489       | 0.074     | 0.492         | 0.335       | 0.624        | 96              |
| <b>Scenario 9</b>  |             |             |           |               |             |              |                 |
| N                  | 100.00      | 99.561      | 15.331    | 98.540        | 72.350      | 132.310      | 97              |
| $\sigma$           | 0.10        | 0.107       | 0.016     | 0.106         | 0.079       | 0.140        | 97              |
| $\sigma_{det}$     | 0.15        | 0.149       | 0.006     | 0.149         | 0.138       | 0.162        | 93              |
| $\lambda_0$        | 1.00        | 1.024       | 0.105     | 1.019         | 0.835       | 1.245        | 90              |
| $\gamma$           | 0.50        | 0.458       | 0.105     | 0.464         | 0.233       | 0.643        | 97              |
| <b>Scenario 10</b> |             |             |           |               |             |              |                 |
| N                  | 100.00      | 101.556     | 16.328    | 100.410       | 73.040      | 136.820      | 96              |
| $\sigma$           | 0.20        | 0.219       | 0.031     | 0.217         | 0.166       | 0.287        | 93              |
| $\sigma_{det}$     | 0.05        | 0.049       | 0.004     | 0.049         | 0.043       | 0.056        | 94              |
| $\lambda_0$        | 5.00        | 5.251       | 0.748     | 5.187         | 3.972       | 6.901        | 94              |
| $\gamma$           | 0.50        | 0.416       | 0.121     | 0.425         | 0.161       | 0.625        | 93              |
| <b>Scenario 11</b> |             |             |           |               |             |              |                 |
| N                  | 100.00      | 98.839      | 12.860    | 98.040        | 75.820      | 126.160      | 97              |
| $\sigma$           | 0.20        | 0.203       | 0.013     | 0.202         | 0.178       | 0.230        | 97              |
| $\sigma_{det}$     | 0.10        | 0.100       | 0.003     | 0.100         | 0.094       | 0.107        | 94              |
| $\lambda_0$        | 3.00        | 3.030       | 0.268     | 3.017         | 2.542       | 3.590        | 94              |
| $\gamma$           | 0.50        | 0.489       | 0.056     | 0.491         | 0.373       | 0.594        | 95              |
| <b>Scenario 12</b> |             |             |           |               |             |              |                 |
| N                  | 100.00      | 99.434      | 13.837    | 98.550        | 74.820      | 128.930      | 97              |
| $\sigma$           | 0.20        | 0.214       | 0.029     | 0.213         | 0.163       | 0.272        | 89              |
| $\sigma_{det}$     | 0.15        | 0.147       | 0.012     | 0.146         | 0.127       | 0.172        | 93              |
| $\lambda_0$        | 0.50        | 0.542       | 0.096     | 0.535         | 0.375       | 0.749        | 96              |
| $\gamma$           | 0.50        | 0.443       | 0.102     | 0.448         | 0.229       | 0.626        | 91              |

Table S3: Summaries of the parameter estimates for each of the simulation scenarios of the correlated random walk model (labeled as Scenarios 7 – 12 in the main text).

| <b>Parameter</b>    | <b>True</b> | <b>Mean</b> | <b>sd</b> | <b>median</b> | <b>2.5%</b> | <b>97.5%</b> | <b>Coverage</b> |
|---------------------|-------------|-------------|-----------|---------------|-------------|--------------|-----------------|
| <b>Scenario 7A</b>  |             |             |           |               |             |              |                 |
| N                   | 100.00      | 100.538     | 16.740    | 99.290        | 71.350      | 136.640      | 98              |
| $\sigma$            | 0.10        | 0.101       | 0.004     | 0.101         | 0.092       | 0.109        | 92              |
| $\sigma_{det}$      | 0.05        | 0.050       | 0.001     | 0.050         | 0.047       | 0.053        | 93              |
| $\lambda_0$         | 5.00        | 5.112       | 0.649     | 5.062         | 3.984       | 6.527        | 95              |
| $\gamma$            | 0.50        | 0.492       | 0.043     | 0.493         | 0.407       | 0.574        | 94              |
| <b>Scenario 8A</b>  |             |             |           |               |             |              |                 |
| N                   | 100.00      | 98.905      | 14.802    | 97.900        | 72.85       | 130.680      | 96              |
| $\sigma$            | 0.10        | 0.100       | 0.006     | 0.100         | 0.089       | 0.112        | 96              |
| $\sigma_{det}$      | 0.10        | 0.100       | 0.002     | 0.100         | 0.096       | 0.104        | 95              |
| $\lambda_0$         | 3.00        | 3.035       | 0.228     | 3.025         | 2.616       | 3.508        | 96              |
| $\gamma$            | 0.50        | 0.499       | 0.048     | 0.500         | 0.400       | 0.590        | 98              |
| <b>Scenario 9A</b>  |             |             |           |               |             |              |                 |
| N                   | 100.00      | 100.305     | 14.565    | 99.360        | 74.605      | 131.490      | 96              |
| $\sigma$            | 0.10        | 0.102       | 0.009     | 0.101         | 0.085       | 0.120        | 96              |
| $\sigma_{det}$      | 0.15        | 0.150       | 0.004     | 0.150         | 0.143       | 0.157        | 93              |
| $\lambda_0$         | 1.00        | 1.004       | 0.075     | 1.002         | 0.865       | 1.159        | 93              |
| $\gamma$            | 0.50        | 0.485       | 0.066     | 0.487         | 0.348       | 0.605        | 96              |
| <b>Scenario 10A</b> |             |             |           |               |             |              |                 |
| N                   | 100.00      | 100.244     | 14.490    | 99.230        | 74.760      | 131.370      | 95              |
| $\sigma$            | 0.20        | 0.200       | 0.007     | 0.200         | 0.187       | 0.214        | 97              |
| $\sigma_{det}$      | 0.05        | 0.050       | 0.001     | 0.050         | 0.047       | 0.053        | 93              |
| $\lambda_0$         | 5.00        | 5.066       | 0.644     | 5.017         | 3.945       | 6.465        | 96              |
| $\gamma$            | 0.50        | 0.499       | 0.038     | 0.499         | 0.424       | 0.573        | 94              |
| <b>Scenario 11A</b> |             |             |           |               |             |              |                 |
| N                   | 100.00      | 99.159      | 12.086    | 98.440        | 77.620      | 124.78       | 98              |
| $\sigma$            | 0.20        | 0.201       | 0.007     | 0.201         | 0.187       | 0.216        | 96              |
| $\sigma_{det}$      | 0.10        | 0.100       | 0.002     | 0.100         | 0.096       | 0.105        | 92              |
| $\lambda_0$         | 3.00        | 3.007       | 0.224     | 2.998         | 2.594       | 3.472        | 95              |
| $\gamma$            | 0.50        | 0.497       | 0.036     | 0.497         | 0.424       | 0.567        | 99              |
| <b>Scenario 12A</b> |             |             |           |               |             |              |                 |
| N                   | 100.00      | 100.046     | 12.957    | 99.190        | 77.050      | 127.680      | 97              |
| $\sigma$            | 0.20        | 0.203       | 0.011     | 0.202         | 0.182       | 0.225        | 98              |
| $\sigma_{det}$      | 0.15        | 0.149       | 0.004     | 0.149         | 0.143       | 0.158        | 95              |
| $\lambda_0$         | 0.50        | 0.511       | 0.053     | 0.508         | 0.413       | 0.621        | 94              |
| $\gamma$            | 0.50        | 0.487       | 0.048     | 0.488         | 0.389       | 0.578        | 94              |

Table S4: Summaries of the parameter estimates for each of the simulation scenarios of the correlated random walk model with 10 telemetered individuals where auxiliary location data are included (labeled as Scenarios 7A – 12A in the main text).

| <b>Parameter</b>   | <b>True</b> | <b>Mean</b> | <b>sd</b> | <b>median</b> | <b>2.5%</b> | <b>97.5%</b> | <b>Coverage</b> |
|--------------------|-------------|-------------|-----------|---------------|-------------|--------------|-----------------|
| <b>Scenario 13</b> |             |             |           |               |             |              |                 |
| N                  | 100.00      | 104.707     | 17.262    | 103.580       | 74.240      | 141.740      | 96              |
| $\sigma$           | 0.10        | 0.101       | 0.007     | 0.100         | 0.088       | 0.114        | 94              |
| $\sigma_{det}$     | 0.10        | 0.100       | 0.004     | 0.100         | 0.092       | 0.108        | 97              |
| $\lambda_0$        | 2.00        | 2.030       | 0.217     | 2.018         | 1.641       | 2.491        | 95              |
| $\delta$           | 0.70        | 0.720       | 0.210     | 0.720         | 0.312       | 1.134        | 93              |
| <b>Scenario 14</b> |             |             |           |               |             |              |                 |
| N                  | 100.00      | 102.163     | 17.568    | 100.860       | 71.380      | 139.950      | 95              |
| $\sigma$           | 0.10        | 0.100       | 0.007     | 0.100         | 0.087       | 0.113        | 93              |
| $\sigma_{det}$     | 0.10        | 0.100       | 0.004     | 0.100         | 0.092       | 0.108        | 97              |
| $\lambda_0$        | 2.00        | 2.034       | 0.224     | 2.021         | 1.634       | 2.512        | 96              |
| $\delta$           | 0.30        | 0.304       | 0.214     | 0.304         | -0.116      | 0.723        | 99              |
| <b>Scenario 15</b> |             |             |           |               |             |              |                 |
| N                  | 100.00      | 100.629     | 15.742    | 99.590        | 72.710      | 134.200      | 94              |
| $\sigma$           | 0.20        | 0.200       | 0.013     | 0.199         | 0.176       | 0.226        | 95              |
| $\sigma_{det}$     | 0.10        | 0.101       | 0.008     | 0.100         | 0.087       | 0.117        | 97              |
| $\lambda_0$        | 1.00        | 1.020       | 0.175     | 1.007         | 0.716       | 1.400        | 97              |
| $\delta$           | 0.70        | 0.702       | 0.201     | 0.698         | 0.316       | 1.107        | 94              |
| <b>Scenario 16</b> |             |             |           |               |             |              |                 |
| N                  | 100.00      | 103.737     | 16.456    | 102.620       | 7.660       | 138.980      | 97              |
| $\sigma$           | 0.20        | 0.199       | 0.013     | 0.199         | 0.176       | 0.226        | 96              |
| $\sigma_{det}$     | 0.10        | 0.099       | 0.007     | 0.099         | 0.086       | 0.115        | 97              |
| $\lambda_0$        | 1.00        | 1.046       | 0.178     | 1.033         | 0.737       | 1.432        | 95              |
| $\delta$           | 0.30        | 0.280       | 0.189     | 0.279         | -0.089      | 0.654        | 90              |
| <b>Scenario 17</b> |             |             |           |               |             |              |                 |
| N                  | 100.00      | 104.989     | 18.054    | 103.670       | 73.460      | 143.865      | 93              |
| $\sigma$           | 0.20        | 0.201       | 0.016     | 0.200         | 0.172       | 0.236        | 94              |
| $\sigma_{det}$     | 0.05        | 0.051       | 0.004     | 0.051         | 0.043       | 0.060        | 93              |
| $\lambda_0$        | 3.00        | 3.035       | 0.525     | 2.988         | 2.144       | 4.197        | 94              |
| $\delta$           | 0.70        | 0.679       | 0.228     | 0.673         | 0.245       | 1.140        | 98              |
| <b>Scenario 18</b> |             |             |           |               |             |              |                 |
| N                  | 100.00      | 104.178     | 18.509    | 102.720       | 72.030      | 144.335      | 97              |
| $\sigma$           | 0.20        | 0.202       | 0.017     | 0.201         | 0.172       | 0.237        | 93              |
| $\sigma_{det}$     | 0.05        | 0.050       | 0.004     | 0.050         | 0.043       | 0.059        | 95              |
| $\lambda_0$        | 3.00        | 3.210       | 0.565     | 3.159         | 2.269       | 4.439        | 95              |
| $\delta$           | 0.30        | 0.335       | 0.221     | 0.332         | -0.092      | 0.776        | 93              |

Table S5: Summaries of the parameter estimates for each of the simulation scenarios of the integrated Langevin-SCR model (labeled as Scenarios 13 – 18 in the main text).

| <b>Scenario</b> | <b>Model type</b>            | $n$   | <b>recaps</b> | <b>failed convergence</b> |
|-----------------|------------------------------|-------|---------------|---------------------------|
| 1               | Simple random walk           | 20.94 | 5.81          | 22                        |
| 2               | Simple random walk           | 24.60 | 12.78         | 4                         |
| 3               | Simple random walk           | 25.23 | 7.08          | 16                        |
| 4               | Simple random walk           | 24.12 | 4.96          | 34                        |
| 5               | Simple random walk           | 30.23 | 10.49         | 0                         |
| 6               | Simple random walk           | 28.83 | 5.95          | 5                         |
| <b>Scenario</b> | <b>Model type</b>            | $n$   | <b>recaps</b> | <b>failed convergence</b> |
| 1T15            | Simple RW with T=15          | 17.70 | 4.16          | 19                        |
| 2T15            | Simple RW with T=15          | 22.80 | 8.27          | 0                         |
| 3T15            | Simple RW with T=15          | 23.47 | 4.62          | 30                        |
| 4T15            | Simple RW with T=15          | 19.6  | 3.62          | 28                        |
| 5T15            | Simple RW with T=15          | 26.62 | 7.22          | 0                         |
| 6T15            | Simple RW with T=15          | 24.76 | 4.12          | 4                         |
| <b>Scenario</b> | <b>Model type</b>            | $n$   | <b>recaps</b> | <b>failed convergence</b> |
| 7               | Correlated random walk       | 24.65 | 7.99          | 57                        |
| 8               | Correlated random walk       | 28.75 | 16.42         | 9                         |
| 9               | Correlated random walk       | 29.94 | 11.83         | 22                        |
| 10              | Correlated random walk       | 30.64 | 6.47          | 92                        |
| 11              | Correlated random walk       | 38.00 | 12.27         | 6                         |
| 12              | Correlated random walk       | 35.42 | 5.03          | 46                        |
| <b>Scenario</b> | <b>Model type</b>            | $n$   | <b>recaps</b> | <b>failed convergence</b> |
| 7A              | Correlated RW with telemetry | 24.66 | 7.99          | 10                        |
| 8A              | Correlated RW with telemetry | 28.87 | 16.37         | 4                         |
| 9A              | Correlated RW with telemetry | 30.32 | 11.86         | 13                        |
| 10A             | Correlated RW with telemetry | 30.68 | 6.25          | 20                        |
| 11A             | Correlated RW with telemetry | 38.08 | 12.27         | 7                         |
| 12A             | Correlated RW with telemetry | 35.78 | 4.95          | 8                         |
| <b>Scenario</b> | <b>Model type</b>            | $n$   | <b>recaps</b> | <b>failed convergence</b> |
| 13              | Langevin                     | 27.33 | 12.84         | 4                         |
| 14              | Langevin                     | 25.86 | 12.88         | 5                         |
| 15              | Langevin                     | 29.41 | 5.74          | 5                         |
| 16              | Langevin                     | 29.52 | 5.72          | 8                         |
| 17              | Langevin                     | 26.89 | 4.94          | 39                        |
| 18              | Langevin                     | 26.00 | 5.06          | 39                        |

Table S6: For each scenario, we report the average number of individuals captured,  $n$ , the average number of recaptures, 'recaps', and the number of simulated datasets where the model did not converge based on the R-hat, 'failed convergence'. See discussion at the beginning of this appendix for more details on the convergence results.
